# Supplementary material for: Conserved noncoding sequences provide insights into regulatory sequence and loss of gene expression in maize
Source: HighWire-hosted journal article supplement (doi:10.1101/gr.266528.120), 2021-05-27
Supplement: Supplemental_Information.docx [file Supplemental_Information.docx]

­­­­­­­­­­­­­­­­­­**Supplemental_Fig_S1.pdf**

**Supplemental Fig S1.** **Assembly and evaluation of *Chrysopogon serrulatus* and *Hyparrhenia diplandra* genomes.** **(A)** Genome assembly pipeline. **(B)** BUSCO assessment results for both species. **(C)** Minimum extent of the flanking regions. The green rectangle represents the target BASCO gene; n1 is the distance between the edge of the gene and the edge of the contig on one side, while n2 is that on the other side. Distribution of minimum extent of the flanking regions for *C. serrulatus* **(D)** and *H. diplandra* **(E)**. **(F)** Statistical summary of the two genome assemblies. Haploid genome size for each species was estimated by flow cytometry. Both genome assemblies were partially collapsed.

**Supplemental_Fig_S2.pdf**

**Supplemental Fig S2.** **Positive correlation between the total CNS length (number of matched base-pairs in the maize genome) and the query genome size in five Andropogoneae species.** The x axis indicates the genome sizes of query genomes. And the y axis indicates the number of base-pairs (total CNS length) in the reference (maize) genome being identified as CNS.

**Supplemental_Fig_S3.pdf**

**Supplemental Fig S3.** **CNS length (bp) distribution in each of the five Andropogoneae genomes.** The x-axis indicates the length of each CNS record. The y-axis indicated the number of CNS records with length following into each bin.

**Supplemental_Fig_S4.pdf**

**Supplemental Fig S4.** **Enrichment of the core-And-CNSs (red), pan-And-CNSs (green), and CNSs identified by aligning sorghum genome sequence to maize genome sequence (blue) in different types of features of putative *cis*-regulatory sequences, including H3K9ac ChIP-seq peaks, open chromatin regions, and transcription factor binding sites (TFBSs).** The open chromatin regions were identified in leaf (Ricci et al. 2019) and ear tissues (Tu et al. 2020); the 104 TFBSs were measured in leaves (Tu et al. 2020); the H3K9ac ChIP-seq peaks were determined in stems and husk leaves (Oka et al. 2017).

**Supplemental_Fig_S5.png**


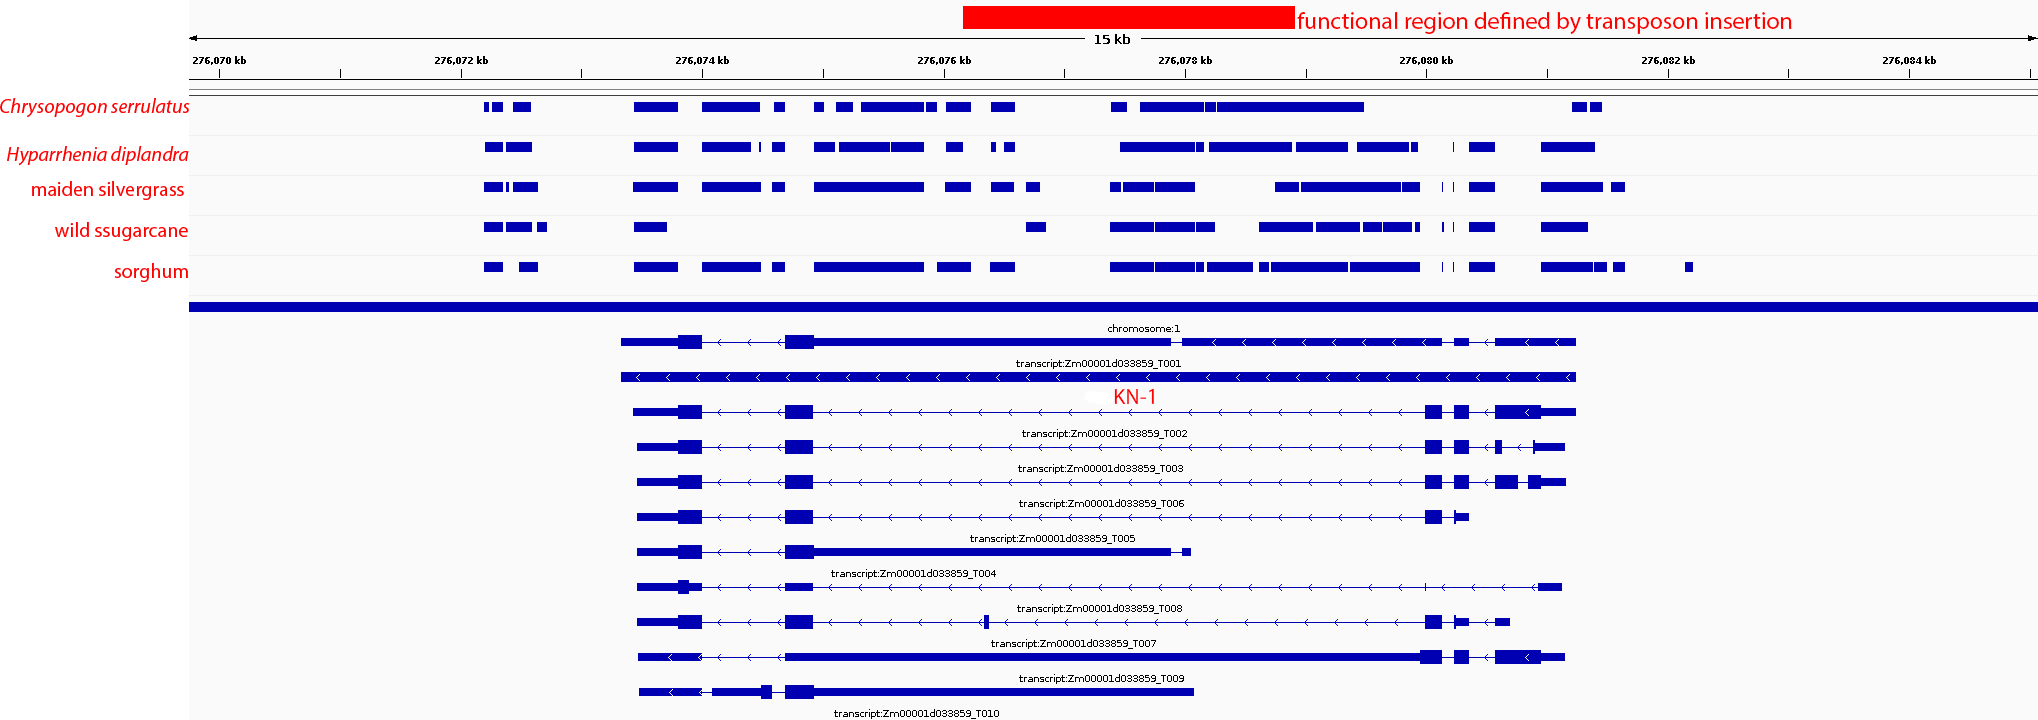


**Supplemental Fig S5.** **Location of the CNSs identified in the third intron of maize *Knotted1* (*KN-1*) gene**. The red box indicates the estimated location of a variants that impact the function of regulatory element [(Greene et al. 1994; Lai et al. 2017)](https://paperpile.com/c/mX0AVj/cxvX+Jtc0).

**Supplemental_Fig_S6.png**


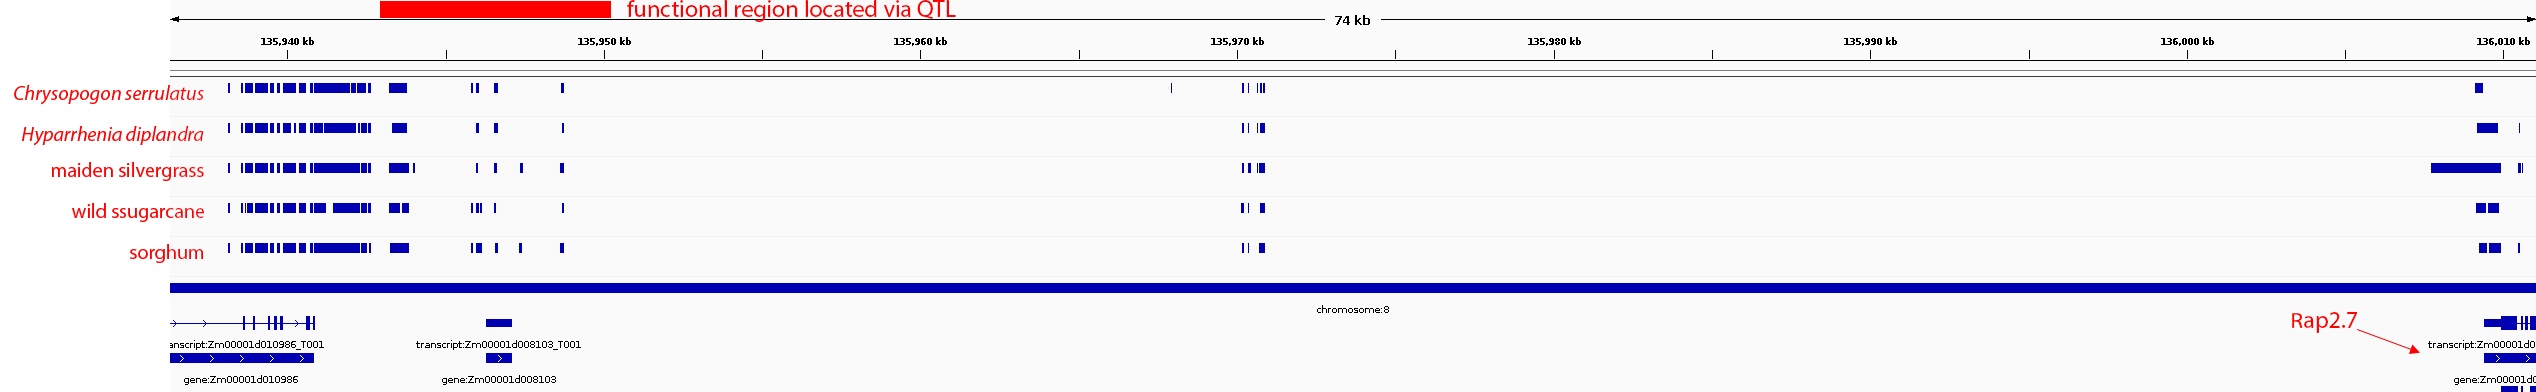


**Supplemental Fig S6.** **Location of the CNSs identified around maize *Vgt1* locus**. The red box indicates the estimated location of a transposon element insertion that impacts the *Rap2.7* gene function.

**Supplemental_Fig_S7.png**


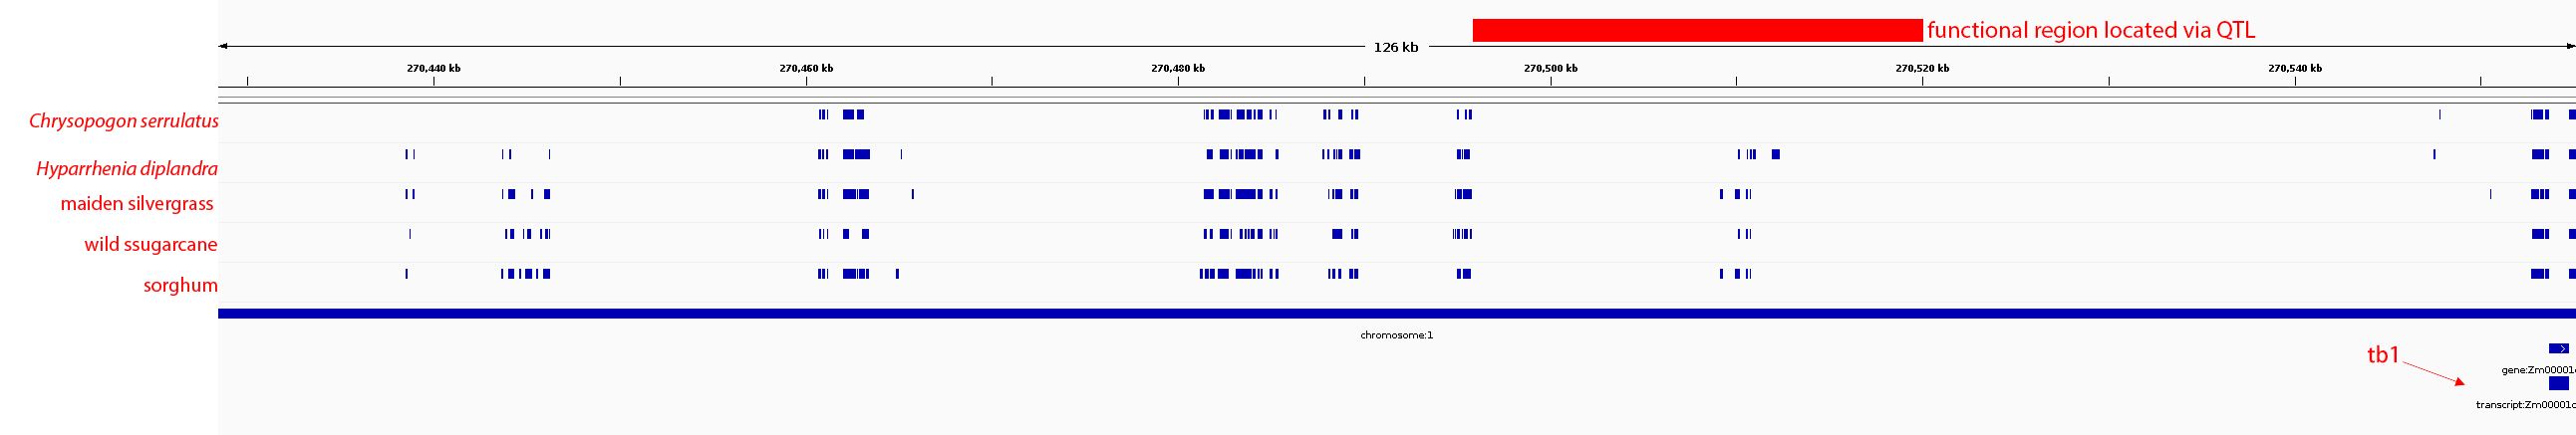


**Supplemental Fig S7.** **Location of the CNSs identified upstream of maize *tb1* (Zm00001d033673) gene**. The red box indicates the estimated location of a variants that impacted the function of potential *cis*-regulator ∼58.7–69.5 kbp upstream of the gene [(Clark et al. 2006; Studer et al. 2011)](https://paperpile.com/c/mX0AVj/BEbz+QW52).

**Supplemental_Fig_S8.pdf**

**Supplemental Fig S8.** **Expression level distribution of genes with or without a pan-And-CNS detected within the 2 kbp upstream region.** **(A)** Maximum gene expression level across 23 tissues. **(B)** Median gene expression level across 23 tissues. **(C)** Tissue specificity of gene expression measured using τ. τ value of 0 indicates a housekeeping gene, 1 indicates a tissue-specific gene. **(D)** Tissue specificity of gene expression measured using entropy. Lower entropy values indicate stronger tissue specificity.

**Supplemental_Fig_S9.pdf**

**Supplemental Fig S9.** **Distribution of the number of identified CNS records in different genomic regions**. introns (blue), 3’ UTR and < 20 kbp downstream of the nearest gene (red), 5’UTR and < 20 kbp upstream of the nearest gene (green), and > 20 kbp from the nearest gene (black). If an identified CNS followed into the 20 kbp flanking region of more than one gene, it was only counted once for the nearest gene.

**Supplemental_Fig_S10.pdf**

**Supplemental Fig S10. Low DNA methylation loci were enriched in intergenic pan-And-CNSs.** (**A**) CG low DNA methylation loci. (**B**) CHG low DNA methylation loci. The maize B73 DNA methylation data were retrieved from Xu et al. (2020), which uses a 100 bp tile as a DNA methylation locus. A 100 bp tile with an average methylation value < 0.5 was defined as a low DNA methylation locus, otherwise a high DNA methylation locus.

**Supplemental_Fig_S11.pdf**

**Supplemental Fig S11. Enrichment of conserved elements from** [**(Tian et al. 2020)**](https://paperpile.com/c/mX0AVj/HJtN) **identified in the intergenic regions of the maize genome with H3K9ac ChIP-seq peaks, open chromatin regions, and TFBSs.** The total size of these conserved elements located in the intergenic regions is 16.77 Mb.

**Supplemental_Fig_S12.pdf**

**Supplemental Fig S12.** **(A)** Proportion of intergenic pan-And-CNSs overlapping with feature of putative *cis*-regulatory sequences and chromatin loop anchors. **(B)** From all the 79, 051 pairs of chromatin loop anchors, 77, 952 (986%) have at least one anchor overlapped with pan-And-CNS for ≥ 1 bp.

**Supplemental_Fig_S13.pdf**

**Supplemental Fig S13.** **Enrichment of intergenic pan-And-CNSs in different TE superfamilies.** DHH: Helitrons superfamily; DTA: hAT superfamily; DTC: CACTA superfamily; DTH: Harbinger superfamily; DTM: Mutator superfamily; DTT: Mariner superfamily: DTX: unclassified superfamily; RIL: L1 superfamily; RIT: RTE superfamily; RLC: Copia superfamily; RLG: Gypsy superfamily; RLX: unknown superfamily; RST: tRNA superfamily.

**Supplemental_Fig_S14.pdf**


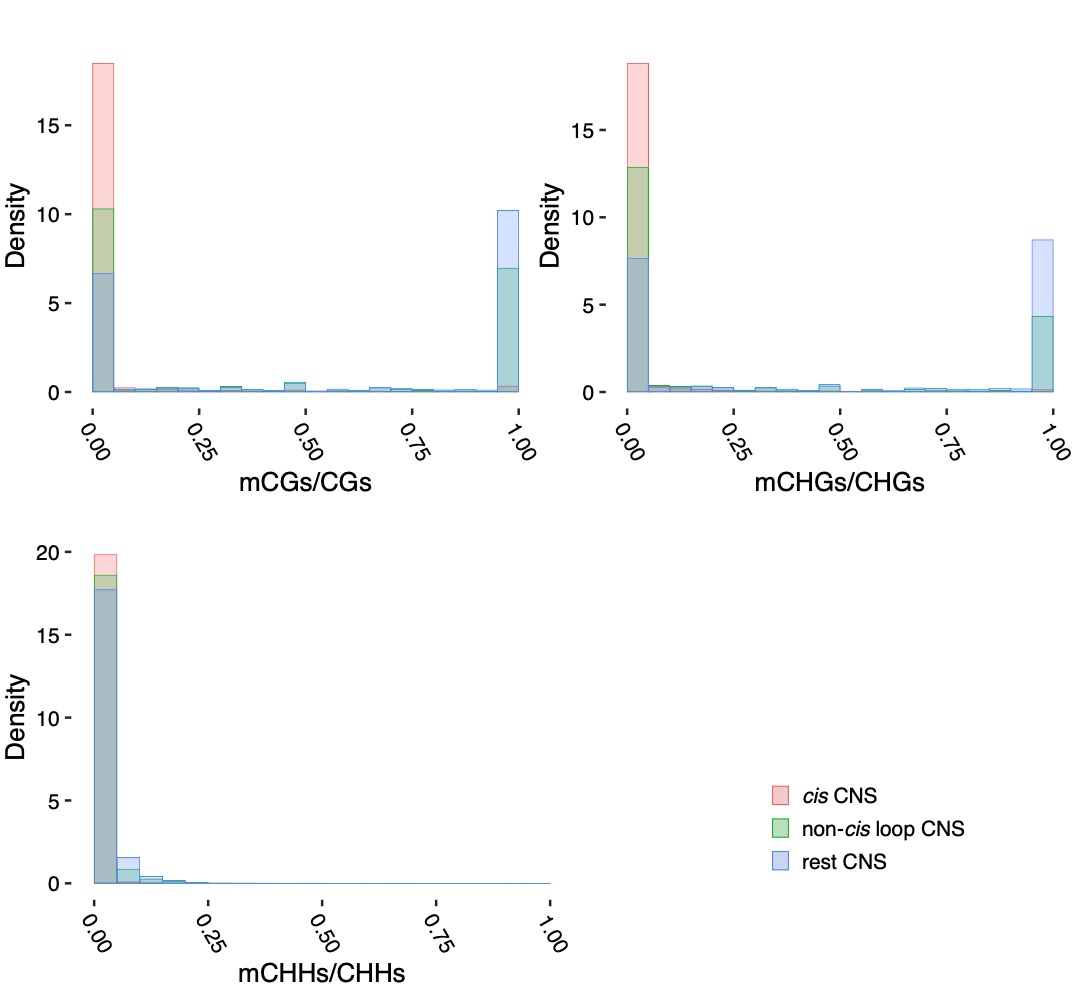


**Supplemental Fig S14. DNA methylation ratio divided** **non-*cis* loop pan-And-CNSs and rest pan-And-CNSs into two distinct groups.** Different DNA methylation ratios were observed for *cis* pan-And-CNSs (red), non-*cis* loop pan-And-CNSs (green), and the rest pan-And-CNSs (blue).

**Supplemental_Fig_S15.pdf**

**Supplemental Fig S15.** **Enrichment of intergenic pan-And-CNSs in active regions of DNA replication in the middle (A) or late (B) S phase of the mitotic cell cycle.** Those active regions of DNA replication that did not overlap with coding genes or CNSs were used as background (intergenic).

**Supplemental_Fig_S16.pdf**

**Supplemental Fig S16.** **Proportion of core-And-CNSs overlapping with annotated features.** Each core-And-CNS fragment can overlap with several annotated features, thus the sum of all the proportions can be greater than 1. Unknown CNSs are those CNSs that do not overlap with any used sequences.

**Supplemental_Fig_S17.pdf**

**Supplemental Fig S17.** **(A)** Density plots corresponding to alignment scores generated by the Smith-Waterman dynamic programming approach (illustrated in the step 4 of Fig. 1 in the main text) for pan-And-CNSs overlapping with different annotated features. **(B)** Density plots corresponding toCNS length (number of base-pairs) for pan-And-CNSs overlapping with different identified features.

**Supplemental_Fig_S18.pdf**

**Supplemental Fig S18.** Comparison of the proportion of maintained intergenic CNSs in the upstream regions (0-2, 2-4, and 4-6 kbp) of the top 1,500 expressed genes in each maize accession (analysis was conducted for multiple tissues separately). If a CNS is located in multiple ranges (for example, in both 0-2 and 2-4 kbp ranges), it was only counted in the range closer to the downstream gene (0-2 kbp). Dashed lines indicate the 99% one-tailed confidence interval calculated by shuffling the gene expression ranks and CNS proportions 1,000 times. Dots beyond the confidence interval are indicated by red color. Root:roots of germinating seedlings; Shoot: shoots of germinating seedlings. LMAN: adult leaves collected at night. LMAD: adult leaves collected during the day;L3base: basal part from the third leaf; L3tip: tip of the third leaf; Kern: kernels at 350-growing-degree days.

**Supplemental_Fig_S19.pdf**

**Supplemental Fig S19.** **Reads mapping coverage ratio of putative functional** ‘absence’ and ‘presence’ **CNS alleles.** For those CNS PAVs significantly associated with gene expression, we further classified all the CNSs alleles of the maize population into functional ‘absence’ and ‘presence’ alleles according to the target gene expression and compared their reads mapping coverage (Methods). The analysis was performed using the gene expression profiles of different tissues separately. (A) Roots of germinating seedlings. (B) Shoots of germinating seedlings. (C) Adult leaves collected at night. (D) Adult leaves collected during the day. (E) Tip of leaf three. (F) Base of leaf three. (G) Kernels at 350-growing-degree days. There were some CNS alleles in the ’presence’ group with low reads mapping coverage and on other side there were some CNSs in the ’absence’ group with high reads mapping coverage. It might due to the CNS loss-of-function could result from insertions or small numbers of single-nucleotide substitutions or deletions. Or those gene expressions being regulated by multiple regulatory elements with natural variation.

**Supplemental_Fig_S20.pdf**

**Supplemental Fig S20** **Distribution of distances between CNS PAVs and their associated genes in different maize tissues**. The blue dashed lines indicate a distance of 2.5 Mbp. **(A)** 4,923 CNS PAVs significantly associated with at least one gene expression variant in roots. (**B)** 5,477 CNS PAVs significantly associated with at least one gene expression variant in shoots. **(C)** 5,378 CNS PAVs significantly associated with at least one gene expression variant in adult leaves collected at night. **(D)** 4,797 CNS PAVs significantly associated with at least one gene expression variant from adult leaves collected under daylight. **(E**) 4,504 CNS PAVs significantly associated with at least one gene expression variant in top part from the third leaf. **(F)** 5,477 CNS PAVs significantly associated with at least one gene expression variant in basal part from the third leaf. **(G)** 4,552 CNS PAVs significantly associated with at least one gene expression variant in kernels at 350-growing-degree-day.

**Supplemental_Fig_S21.pdf**

**Supplemental Fig S21.** **Negative enrichment of CNS in selected regions during domestication and local adaptation.**

**Supplemental_Fig_S22.pdf**

**Supplemental Fig S22.** **A cartoon illustrating the proportion of CNS shared by a pair of maize paralogous genes.** Syntenic genes between the maize genome and the sorghum genome were identified. Orthogroups containing two maize genes and one sorghum gene were selected for this analysis.

**Supplemental_Fig_S23.pdf**

**Supplemental Fig S23.** **Correlation between CNS similarity and gene expression similarity between paralogous genes from the two subgenomes of maize.** **(A)** The horizontal axis is the proportion of shared CNSs within the 2 kbp upstream regions, 2 kbp downstream regions, intron regions, and all (sum) of these three regions. The vertical axis is the expression similarity between pairs of homologous genes from the two subgenomes of maize measured using Pearson’s correlation (r). **(B)** Regression results of the correlation between CNS similarity and expression similarity.

**Supplemental_Fig_S24.pdf**

**Supplemental Fig S24.** **CNS variation is associated with functional diversity between maize subgenomes.** For those orthogroups (including two maize syntenic genes and one sorghum systenic gene) with their two maize genes having negative expression level correlation across 23 tissues of maize B73, we calculated sequence similarity between the major copy (the copy with longer CNS) and sorghum sequence, and sequence similarity between the minor copy (the copy with shorter CNS) and sorghum sequence separately. The sequence similarity was calculated as the number of alignment identical base-pairs/amino acid residues to the sorghum sequence length. **(A)** DNA sequence similarity **(B)** Protein sequence similarity. **(C)** We used the ratio of DNA sequence similarity to protein sequence similarity to compare the nonsynonymous variants to synonymous variants ratio. And the result suggested there was stronger purifying selection acting on nonsynonymous variants of the major copy.

**Supplemental_Fig_S25.pdf**

**Supplemental Fig S25.** Correlation between the total amount of sequencing data (x-axis) and the number of CNSs with > 40% of total length covered by reads (y-axis) for each maize accession. Those maize accessions used by Karl et al. (2019) were used here and the second-generation sequencing reads were published by HapMap3 (Bukowski et al. 2018). A minimum of 14 Gbp of reads (black solid line) for one accession was required to include this accession in further analyses.

**Supplemental_Table_S1.docx**

**Supplemental Table S1 Genome sequences and annotations used in this study**

| species | URL |
| --- | --- |
| maize (*Zea mays*) | ftp://ftp.ensemblgenomes.org/pub/plants/release-34/fasta/zea_mays/dna/Zea_mays.AGPv4.dna.toplevel.fa.gz  ftp://ftp.ensemblgenomes.org/pub/plants/release-34/gff3/zea_mays/Zea_mays.AGPv4.34.gff3.gz |
| sorghum (*Sorghum bicolor*) | ftp://ftp.ensemblgenomes.org/pub/plants/release-42/fasta/sorghum_bicolor/dna/Sorghum_bicolor.Sorghum_bicolor_NCBIv3.dna.toplevel.fa.gz  ftp://ftp.ensemblgenomes.org/pub/plants/release-42/gff3/sorghum_bicolor/Sorghum_bicolor.Sorghum_bicolor_NCBIv3.42.gff3.gz |
| wild sugarcane (*Saccharum spontaneum L.)* | https://www.life.illinois.edu/ming/downloads/Spontaneum_genome/Sspon.HiC_chr_asm.fasta  https://www.life.illinois.edu/ming/downloads/Spontaneum_genome/Sspon.v20190103.gff3.gz |
| maiden silvergrass (*Miscanthus sinensis*) | https://genomevolution.org/coge/GenomeInfo.pl?gid=58021  assembly version V7.0, annotation version V7.1 |
| foxtail millet (*Setaria italica*) | ftp://ftp.ensemblgenomes.org/pub/plants/release-42/fasta/setaria_italica/dna/Setaria_italica.Setaria_italica_v2.0.dna.toplevel.fa.gz  ftp://ftp.ensemblgenomes.org/pub/plants/release-42/gff3/setaria_italica/Setaria_italica.Setaria_italica_v2.0.42.gff3.gz |

**Supplemental_Table_S2.docx**

**Supplemental Table S2 Overlap of features of putative regulatory sequences with pan-And-CNSs**

| **Chromatin feature** | **Tissue** | **Number of records** | **Number of records overlapping with pan-And-CNSs** | **Reference** |
| --- | --- | --- | --- | --- |
| TFBS | leaf | 144890 | 88213 (61%) | (Tu et al. 2020) |
| Open chromatin | leaf | 35675 | 27457 (77%) | (Tu et al. 2020) |
| Open chromatin | leaf | 32111 | 24693 (77%) | (Ricci et al. 2019) |
| Open chromatin | ear | 27075 | 20870 (77%) | (Ricci et al. 2019) |
| H3K9ac deposition sites | stem | 28004 | 22608 (78%) | (Oka et al. 2017) |
| H3K9ac deposition sites | husk leaf | 17170 | 12842 (74%) | (Oka et al. 2017) |
| MNase HS regions | shoot | 245373 | 150774 (61%) | (Rodgers-Melnick et al. 2016) |
| MNase HS regions | root | 138749 | 79136 (57%) | (Rodgers-Melnick et al. 2016) |
| DHSs | root | 37404 | 27203 (73%) | (Zhao et al. 2018) |
| DHSs | leaf | 36254 | 18954 (52%) | (Zhao et al. 2018) |

Oka, Rurika, Johan Zicola, Blaise Weber, Sarah N. Anderson, Charlie Hodgman, Jonathan I. Gent, Jan-Jaap Wesselink, et al. 2017. “Genome-Wide Mapping of Transcriptional Enhancer Candidates Using DNA and Chromatin Features in Maize.” *Genome Biology* 18 (1): 137.

Ricci, William A., Zefu Lu, Lexiang Ji, Alexandre P. Marand, Christina L. Ethridge, Nathalie G. Murphy, Jaclyn M. Noshay, et al. 2019. “Widespread Long-Range Cis-Regulatory Elements in the Maize Genome.” *Nature Plants* 5 (12): 1237–49.

Rodgers-Melnick, Eli, Daniel L. Vera, Hank W. Bass, and Edward S. Buckler. 2016. “Open Chromatin Reveals the Functional Maize Genome.” *Proceedings of the National Academy of Sciences of the United States of America* 113 (22): E3177-84.

Tu, Xiaoyu, María Katherine Mejía-Guerra, Jose A. Valdes Franco, David Tzeng, Po-Yu Chu, Wei Shen, Yingying Wei, et al. 2020. “Reconstructing the Maize Leaf Regulatory Network Using ChIP-Seq Data of 104 Transcription Factors.” *Nature Communications* 11 (1): 5089.

Zhao, Hainan, Wenli Zhang, Lifen Chen, Lei Wang, Alexandre P. Marand, Yufeng Wu, and Jiming Jiang. 2018. “Proliferation of Regulatory DNA Elements Derived from Transposable Elements in the Maize Genome.” *Plant Physiology* 176 (4): 2789–2803.

**Supplemental_Table_S3.docx**

**Supplemental Table S3 Maize accessions used in eGWAS using CNS PAV as independent variables**

38-11Goodman-Buckler

4226

4722

A239

A441-5

A619

A632

A634

A635

A641

A654

A679

A680

A682

B103

B109

B37

B57

B64

B76

B79

B84

C103

C123

CH9

CI187-2

CI3A

CI64

CI66

CM105

CM7

CML108

CML14

CML158Q

CML228

CML247

CML254

CML277

CML281

CML311

CML314

CML328

CML331

CML333

CML38

CML45

CML52

CML69

CML77

CML91

CO106

CO125

CO255

D940Y

DE1

F6

GA209

H105W

H49

H91

H95

HP301

i1677a

I29

Ia5125

IDS69

IDS91

Il14H

ILLHy

K4

Ki11

Ki21

Ki43

Ky21

KY228

L578

M14

M162W

MEF156-55-2

Mo17

Mo47

MS1334

Mt42

N192

NC222

NC230

NC258

NC260

NC262

NC264

NC296

NC302

NC306

NC310

NC314

NC326

NC328

NC336

NC338

NC33

NC340

NC346

NC348

NC350

NC352

NC354

NC356

NC362

NC364

Oh40B

Oh43E

OH7B

Os420

Pa91

R177

SC357

SD40

Sg1533

Sg18

T234

T8

Tx303

Tzi10

Tzi16

Tzi18

Tzi25

U267Y

VA102

Va26

Va35

Va59

Va99

VaW6

Wf9

B73Htrhm

B97

CM174

CML103

DE-2

F44

KI3

Ms71

N6

Oh43

R109B

W22

W64A

WD
