# Supplementary figures and images for: Conserved noncoding sequences provide insights into regulatory sequence and loss of gene expression in maize
Source: HighWire-hosted journal article supplement (doi:10.1101/gr.266528.120), 2021-05-27

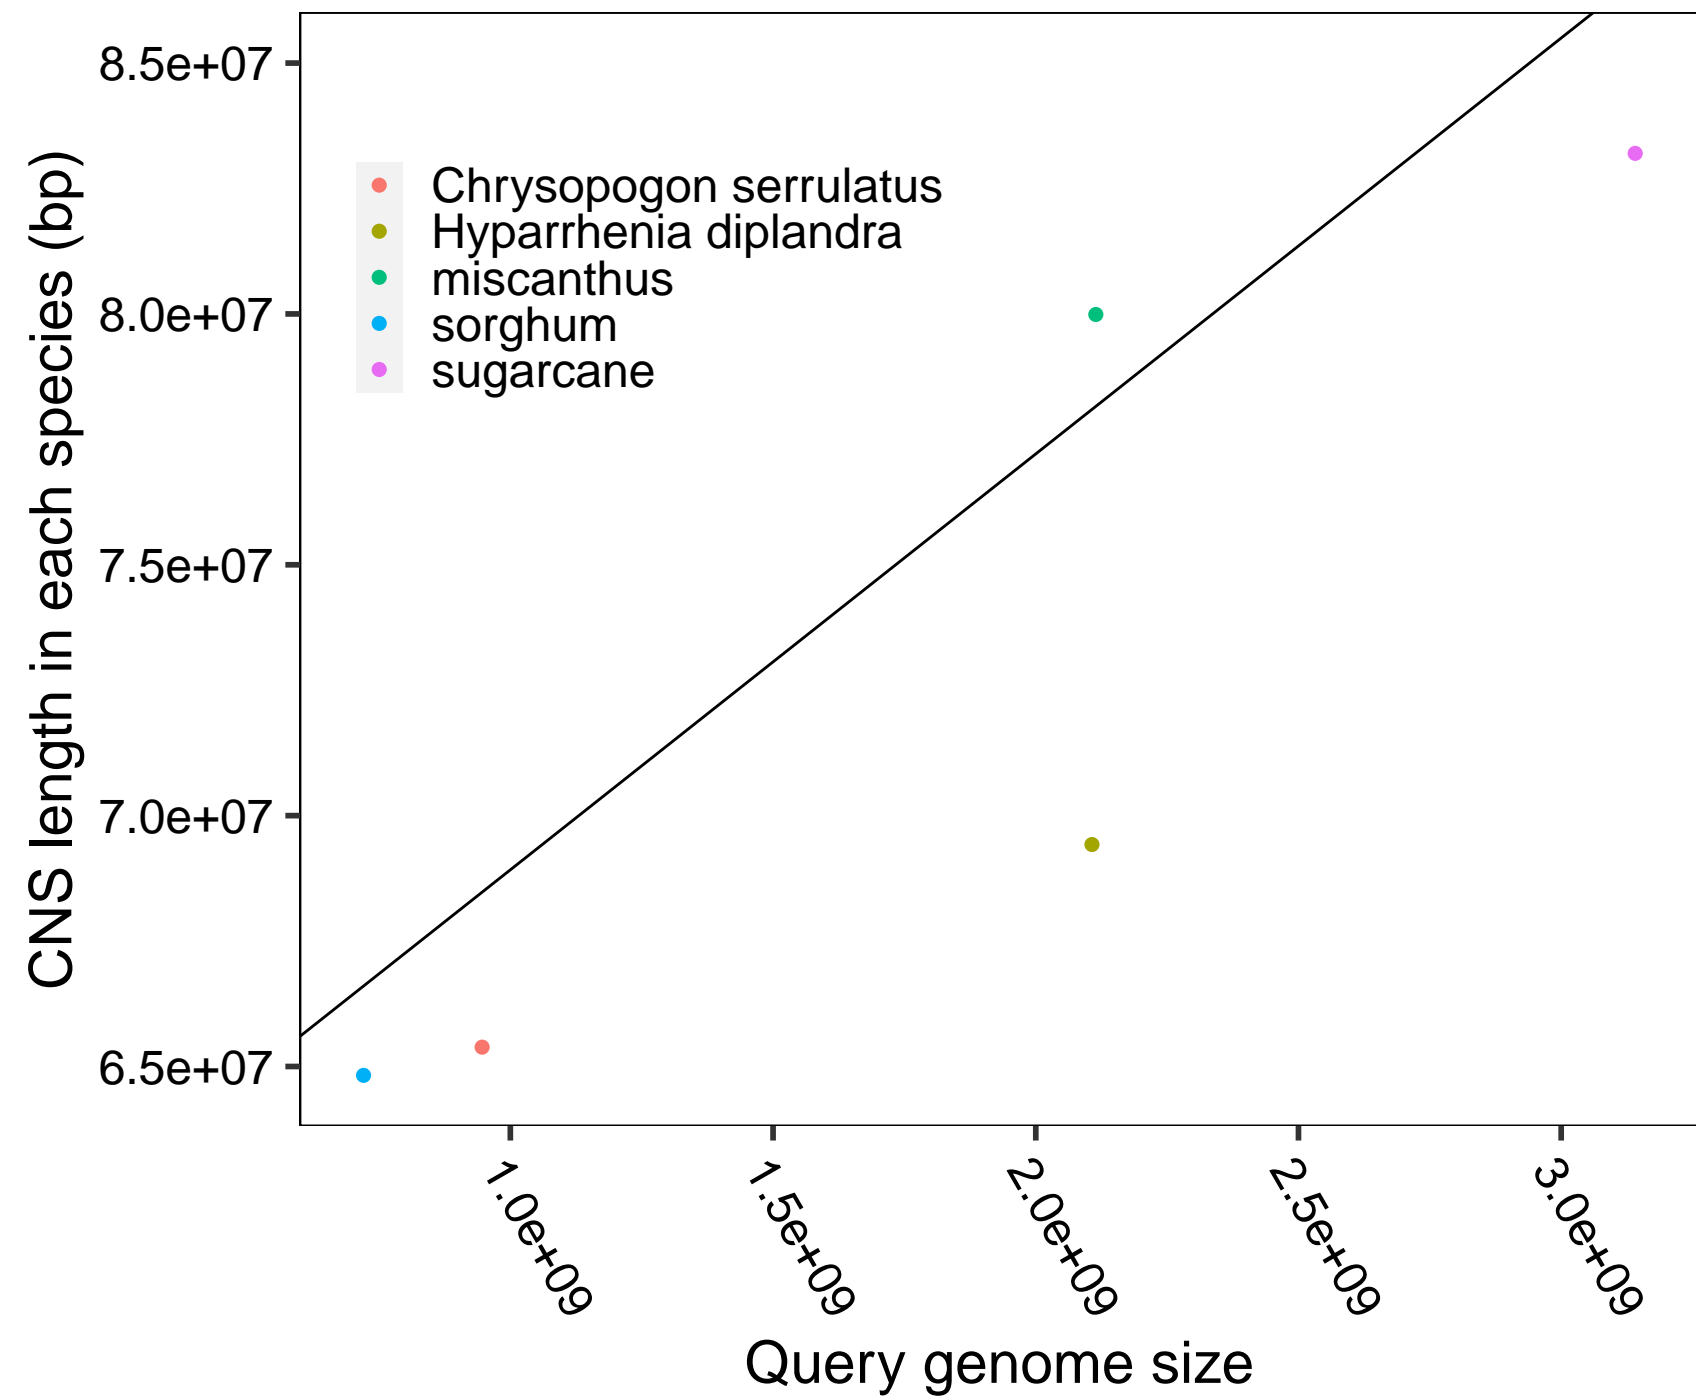

Supplement: Supplemental_Code.tar.gz.zip [file CNS_genome_size_correlation.pdf › dCNS/docs/CNS_genome_size_correlation.pdf]

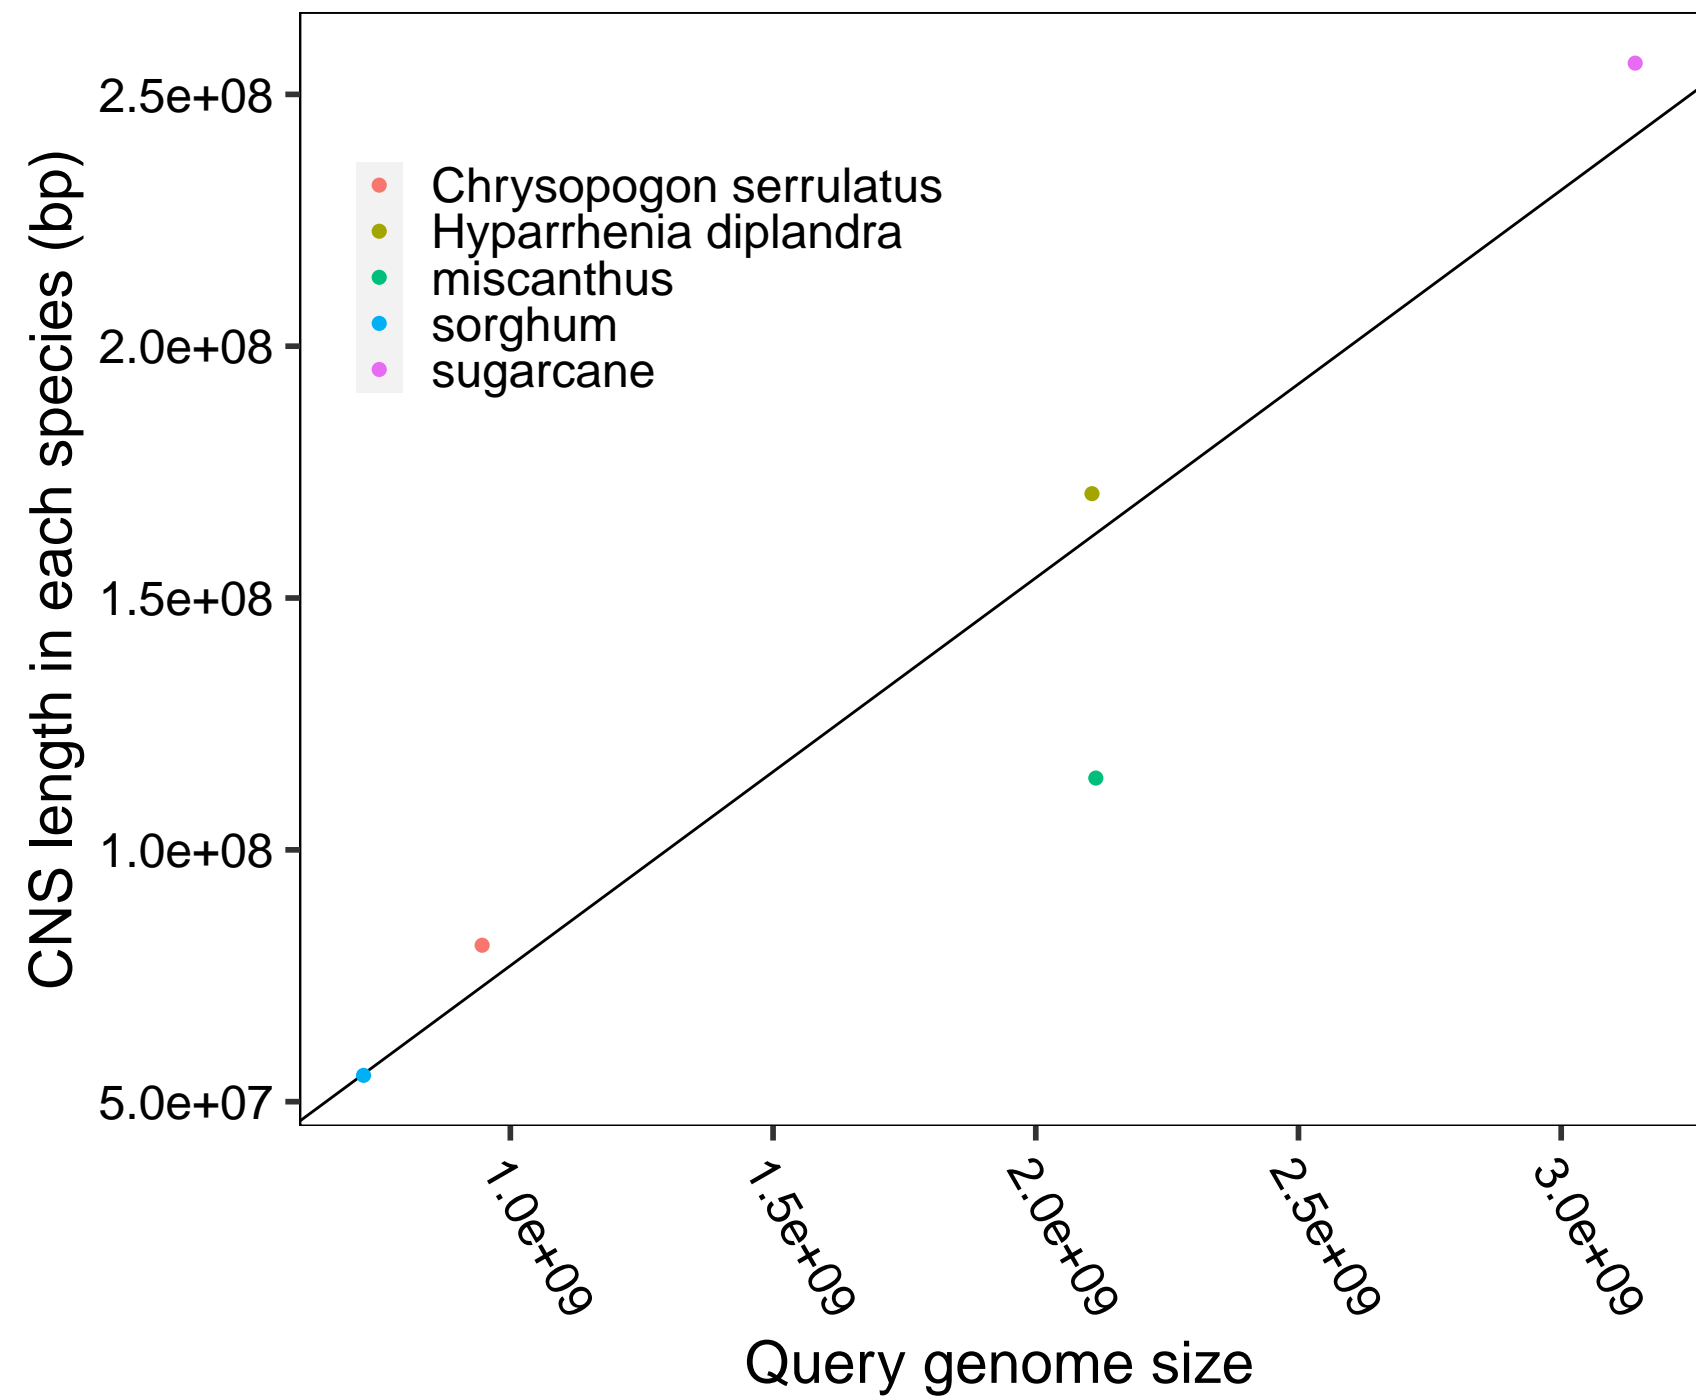

Supplement: Supplemental_Code.tar.gz.zip [file CNS_genome_size_correlation_own_genome.pdf › dCNS/docs/CNS_genome_size_correlation_own_genome.pdf]

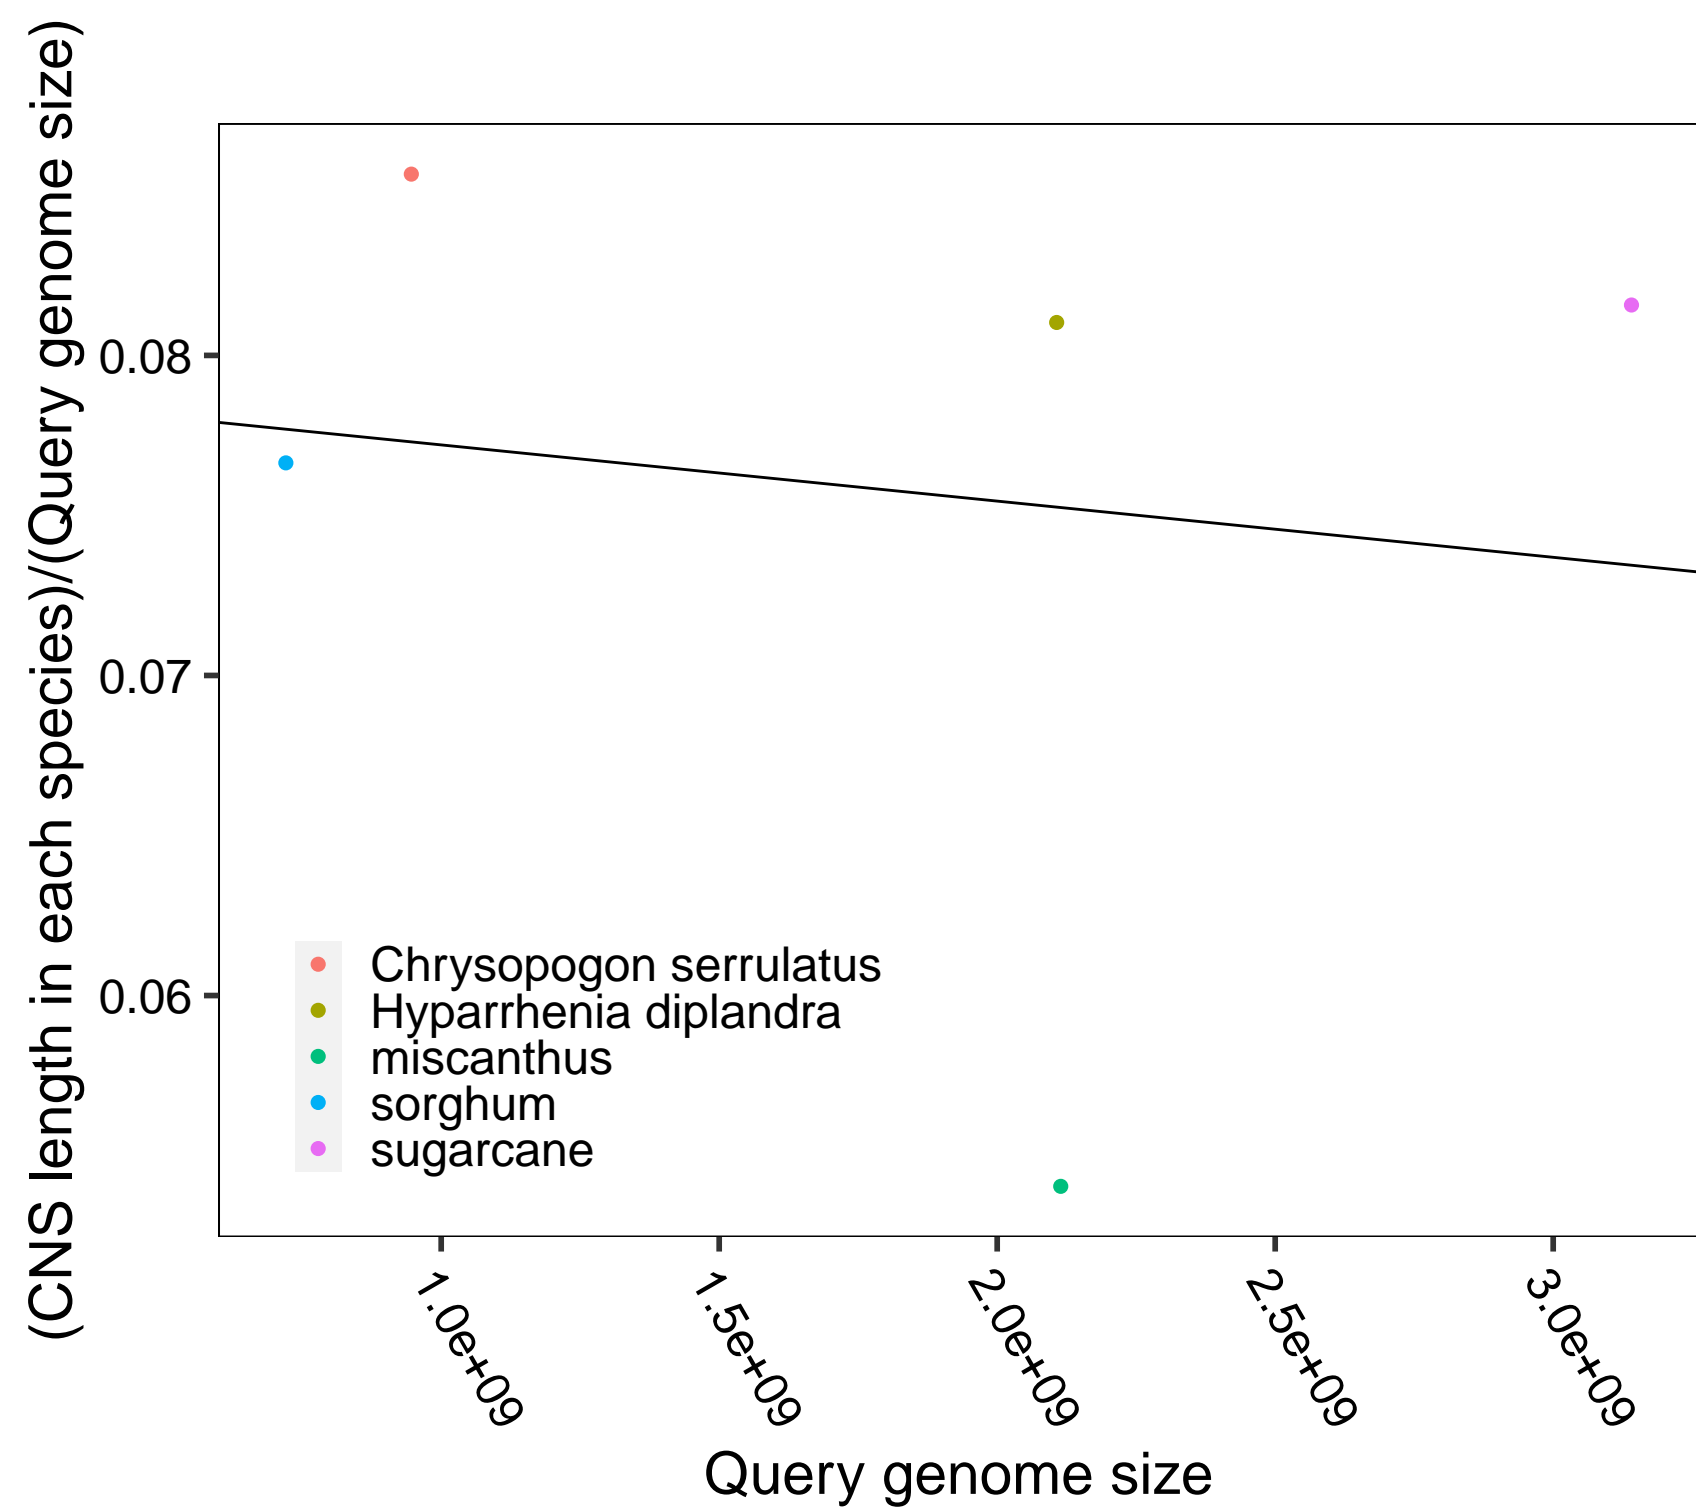

Supplement: Supplemental_Code.tar.gz.zip [file CNS_genome_size_correlation_own_genome_ratio.pdf › dCNS/docs/CNS_genome_size_correlation_own_genome_ratio.pdf]

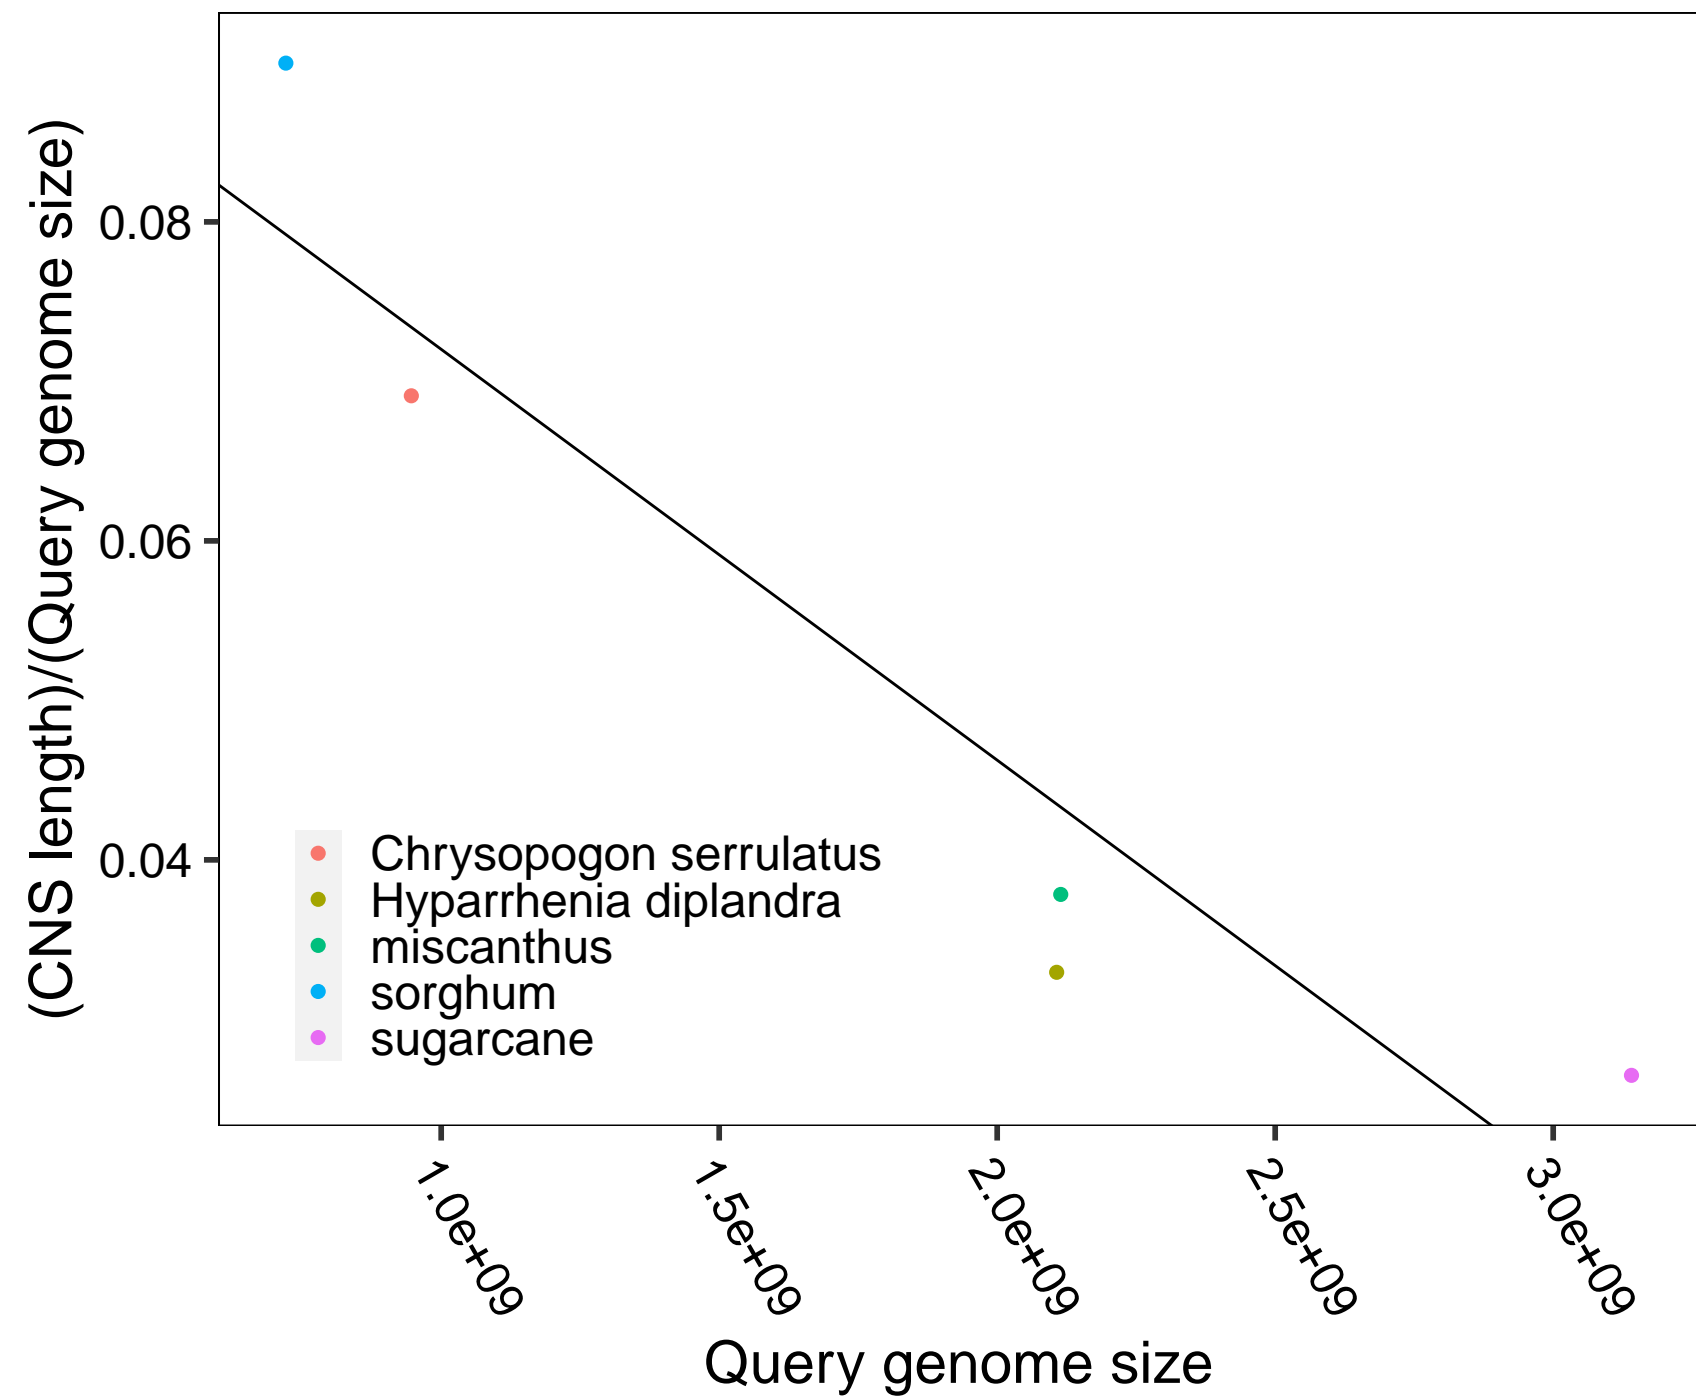

Supplement: Supplemental_Code.tar.gz.zip [file CNS_genome_size_correlation_ratio.pdf › dCNS/docs/CNS_genome_size_correlation_ratio.pdf]

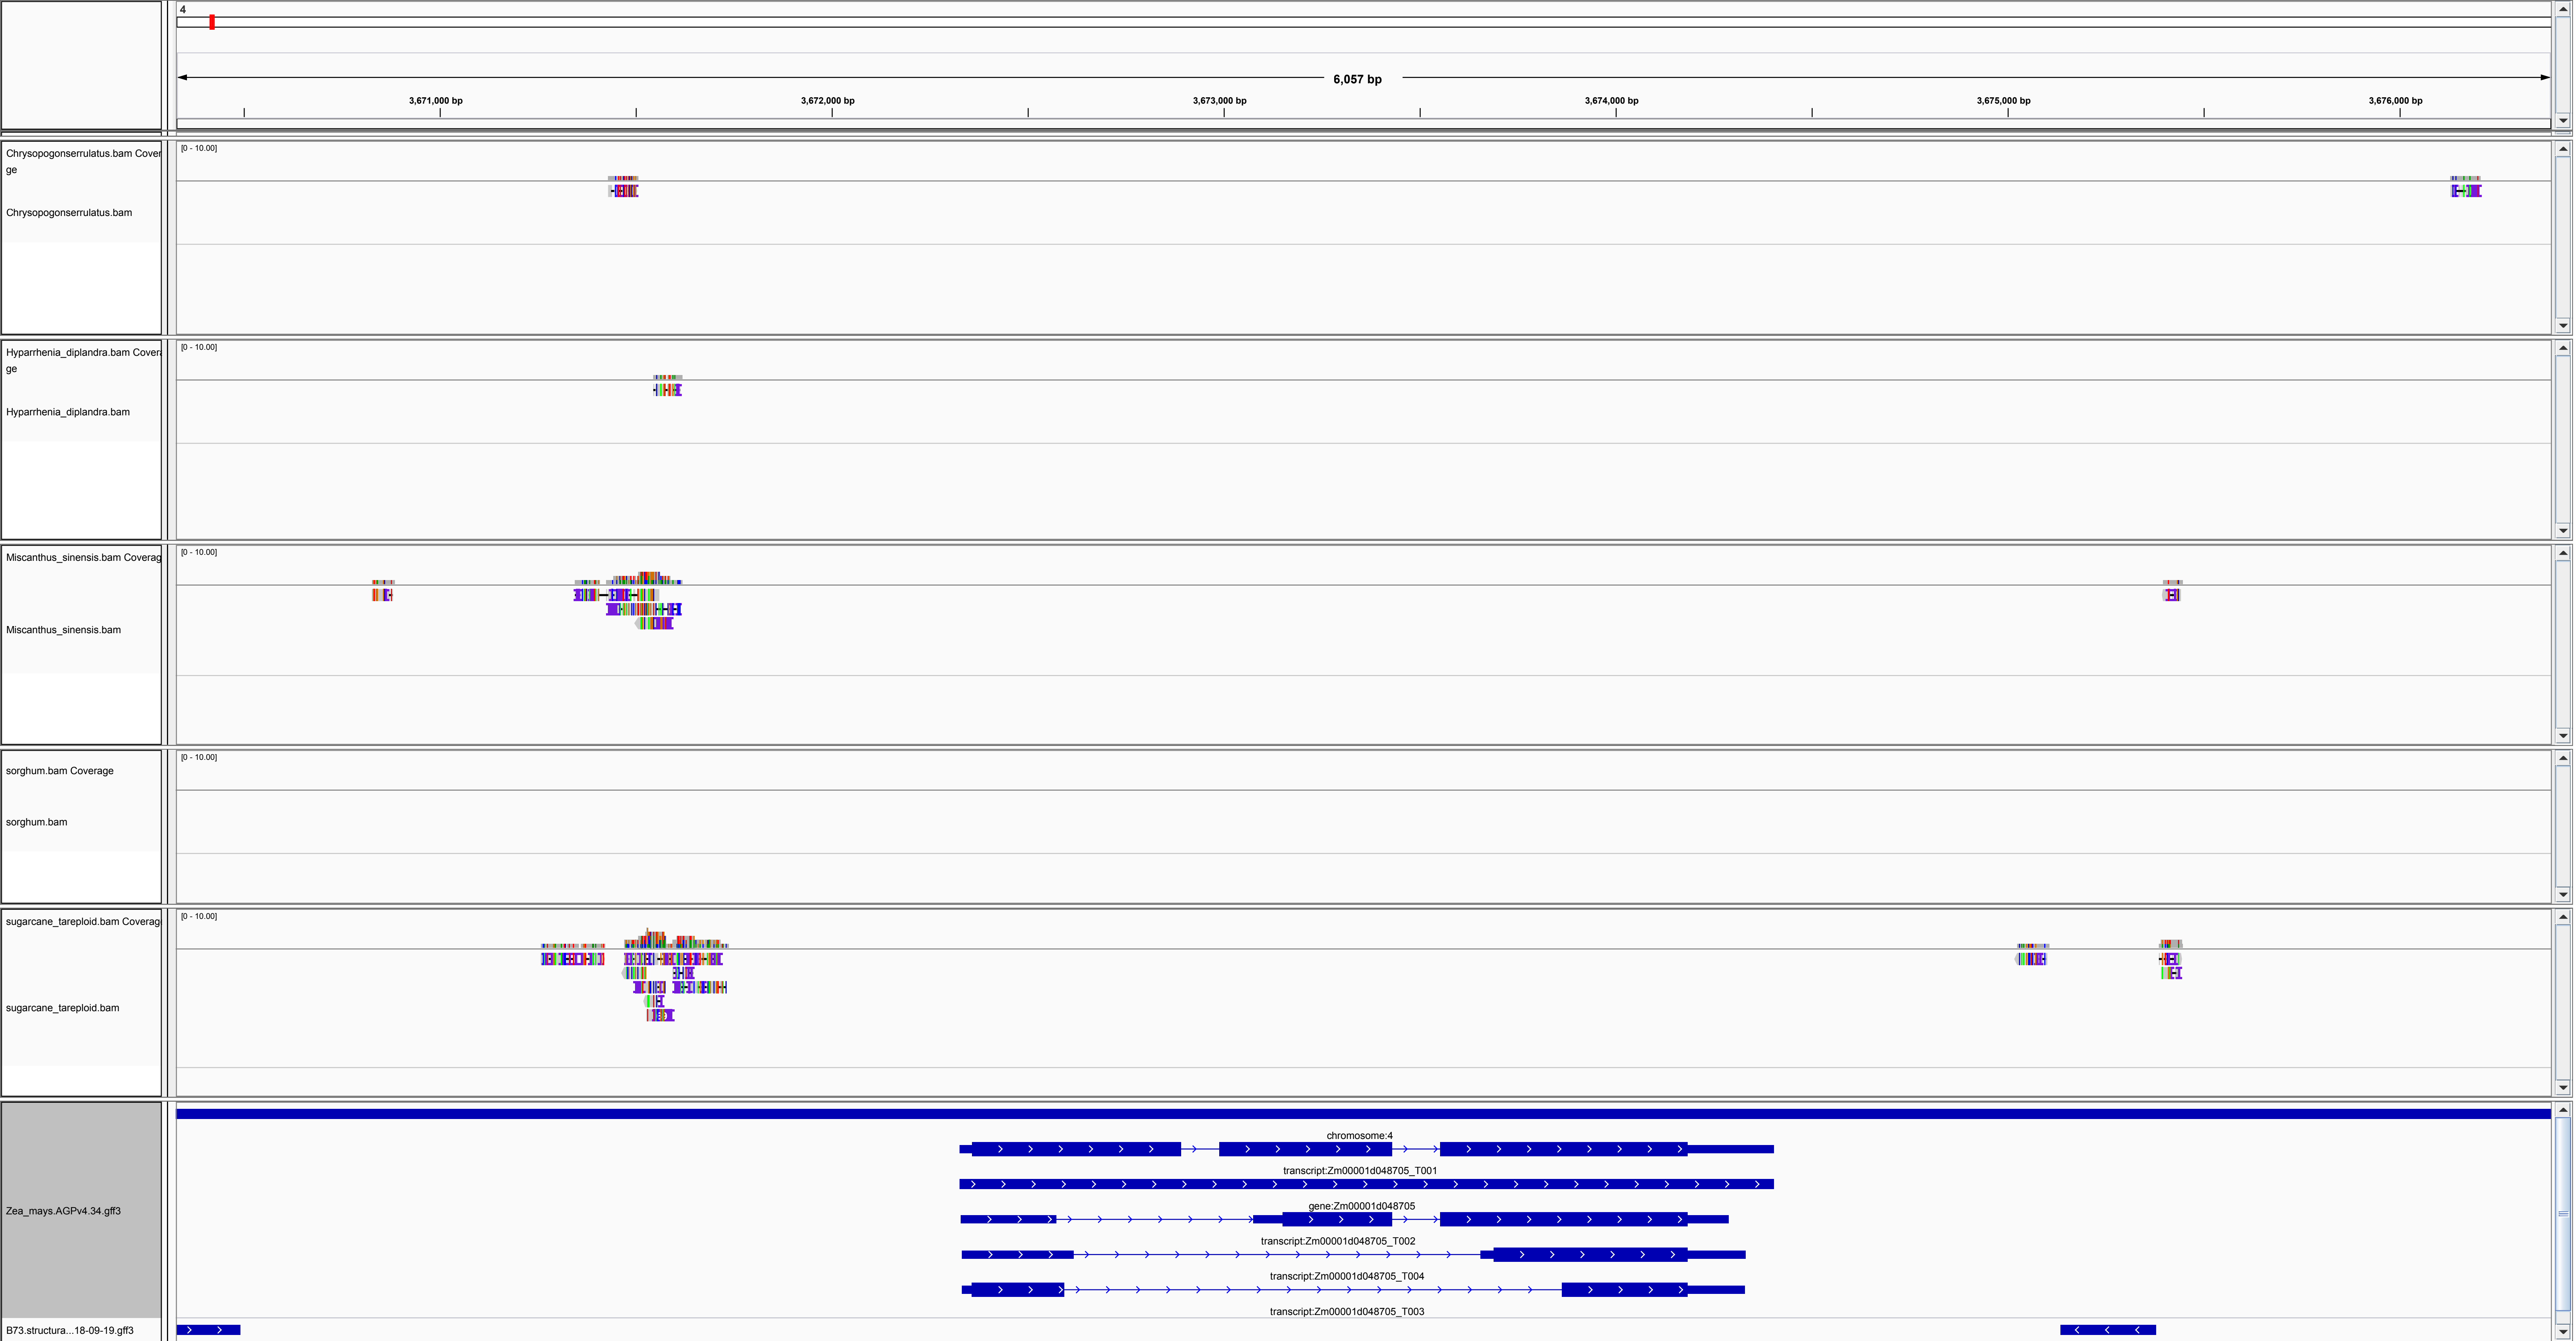

Supplement: Supplemental_Code.tar.gz.zip [file DICE.pdf › dCNS/docs/DICE.pdf]

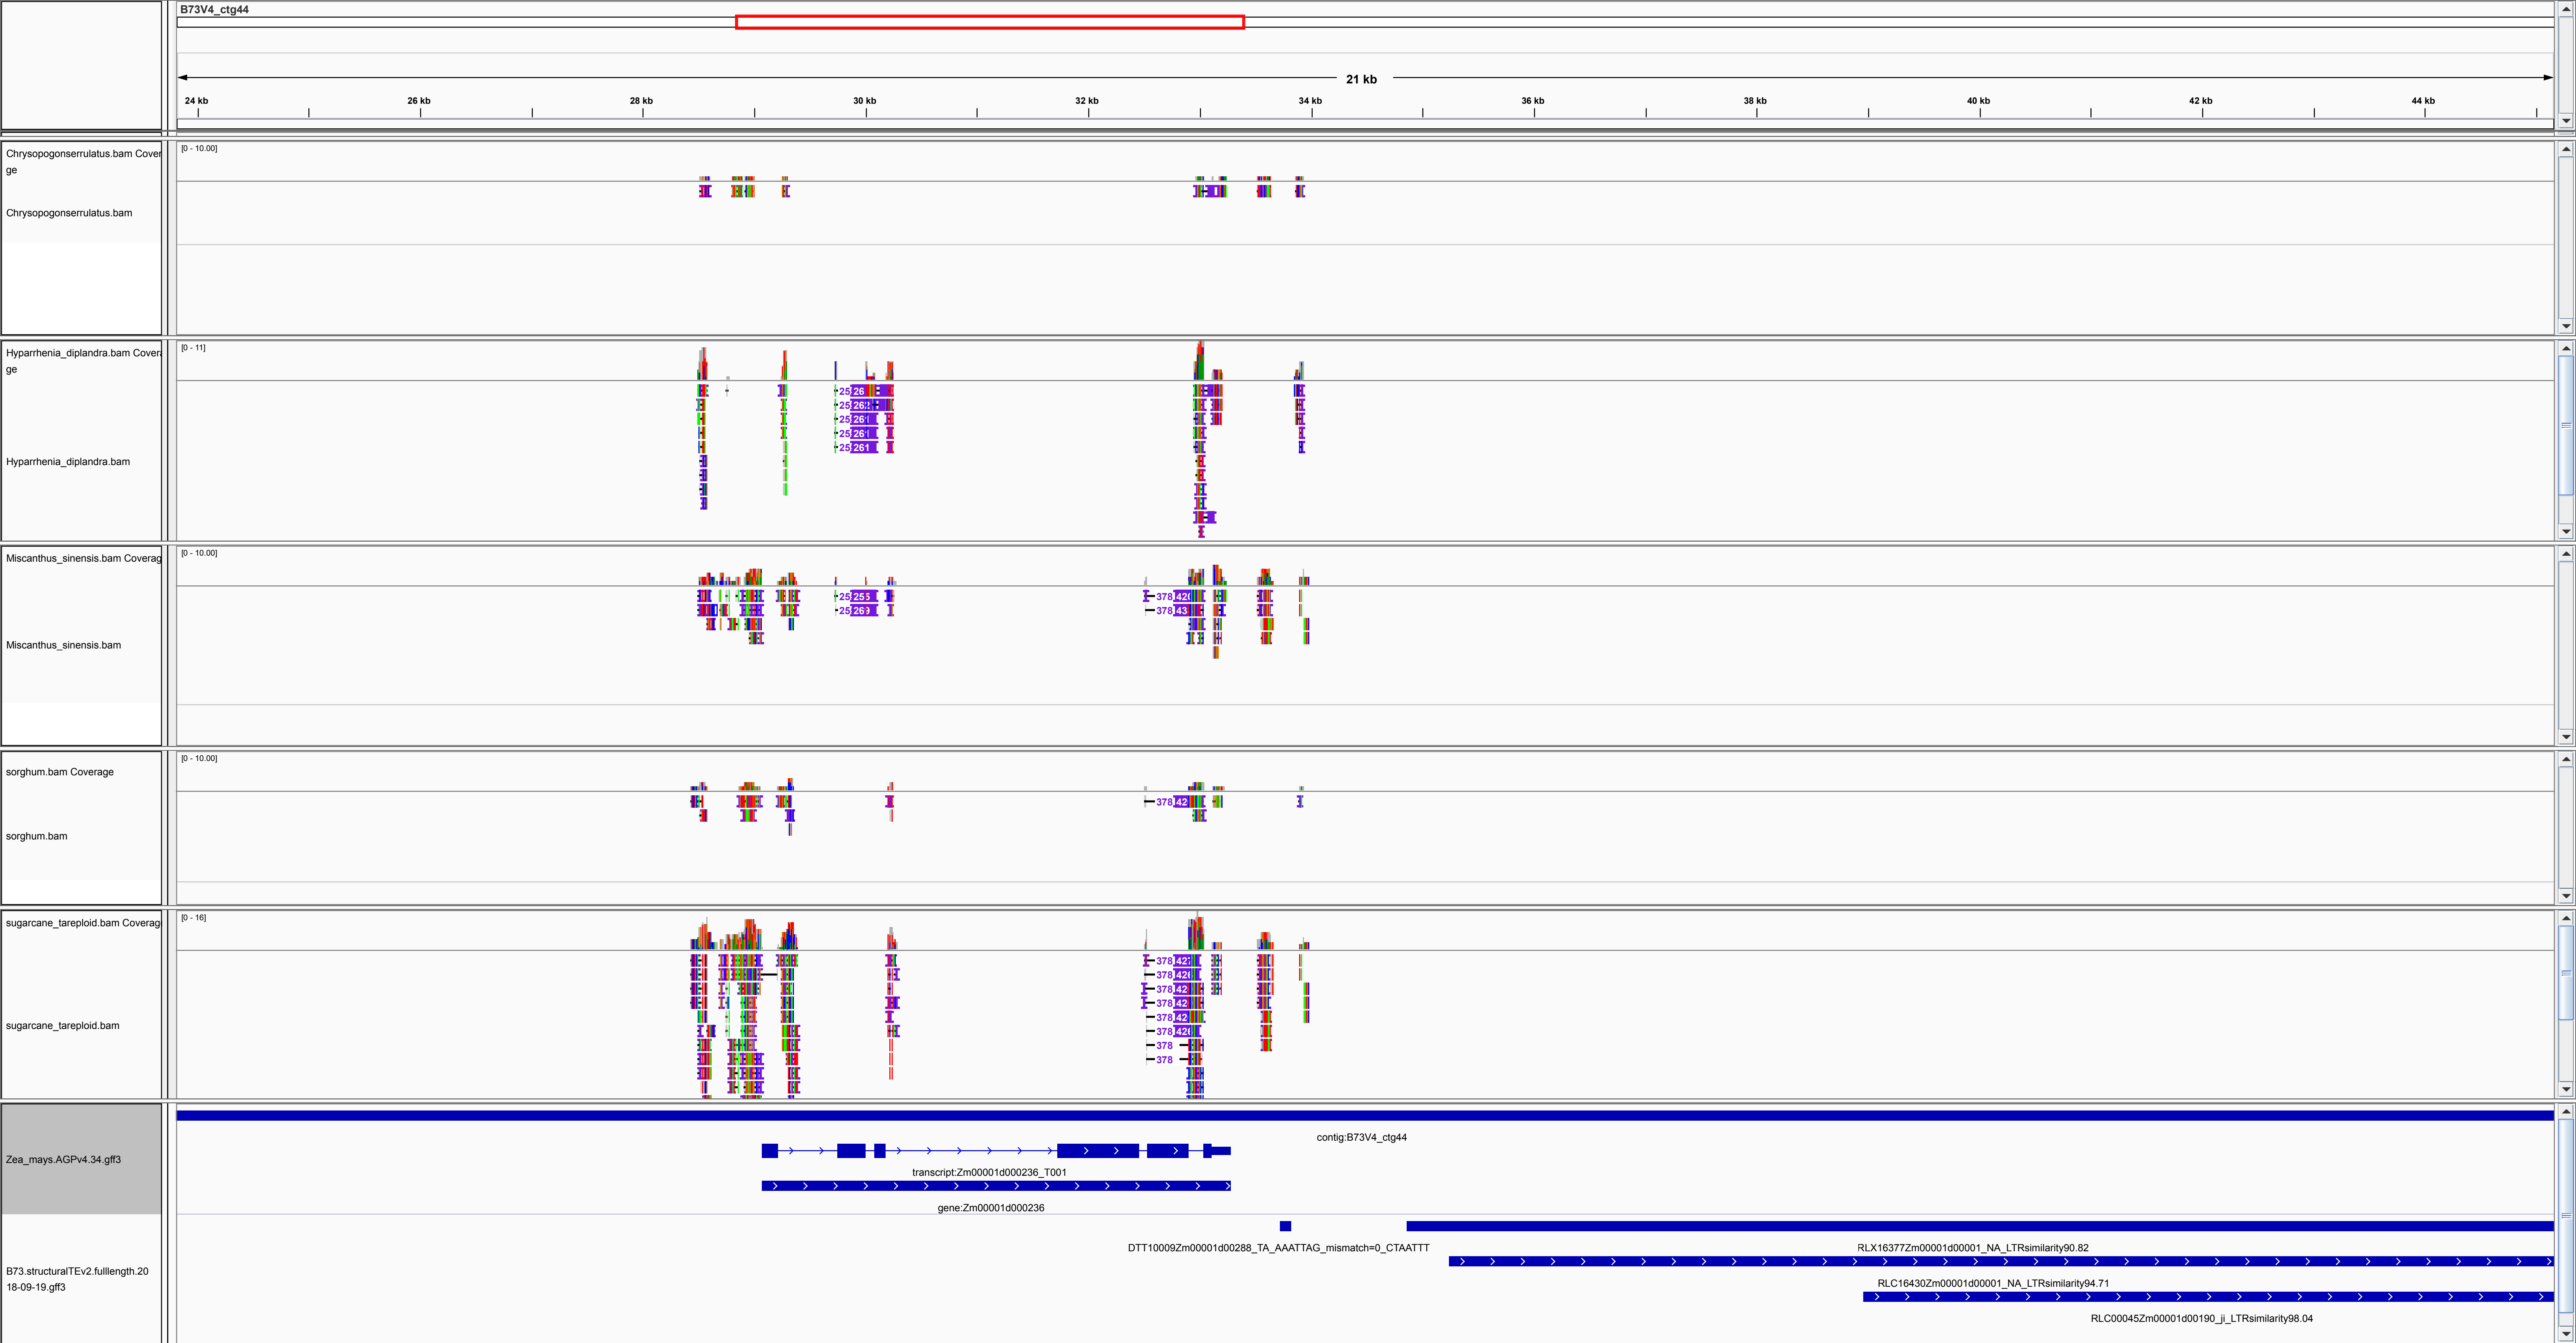

Supplement: Supplemental_Code.tar.gz.zip [file b1.pdf › dCNS/docs/b1.pdf]

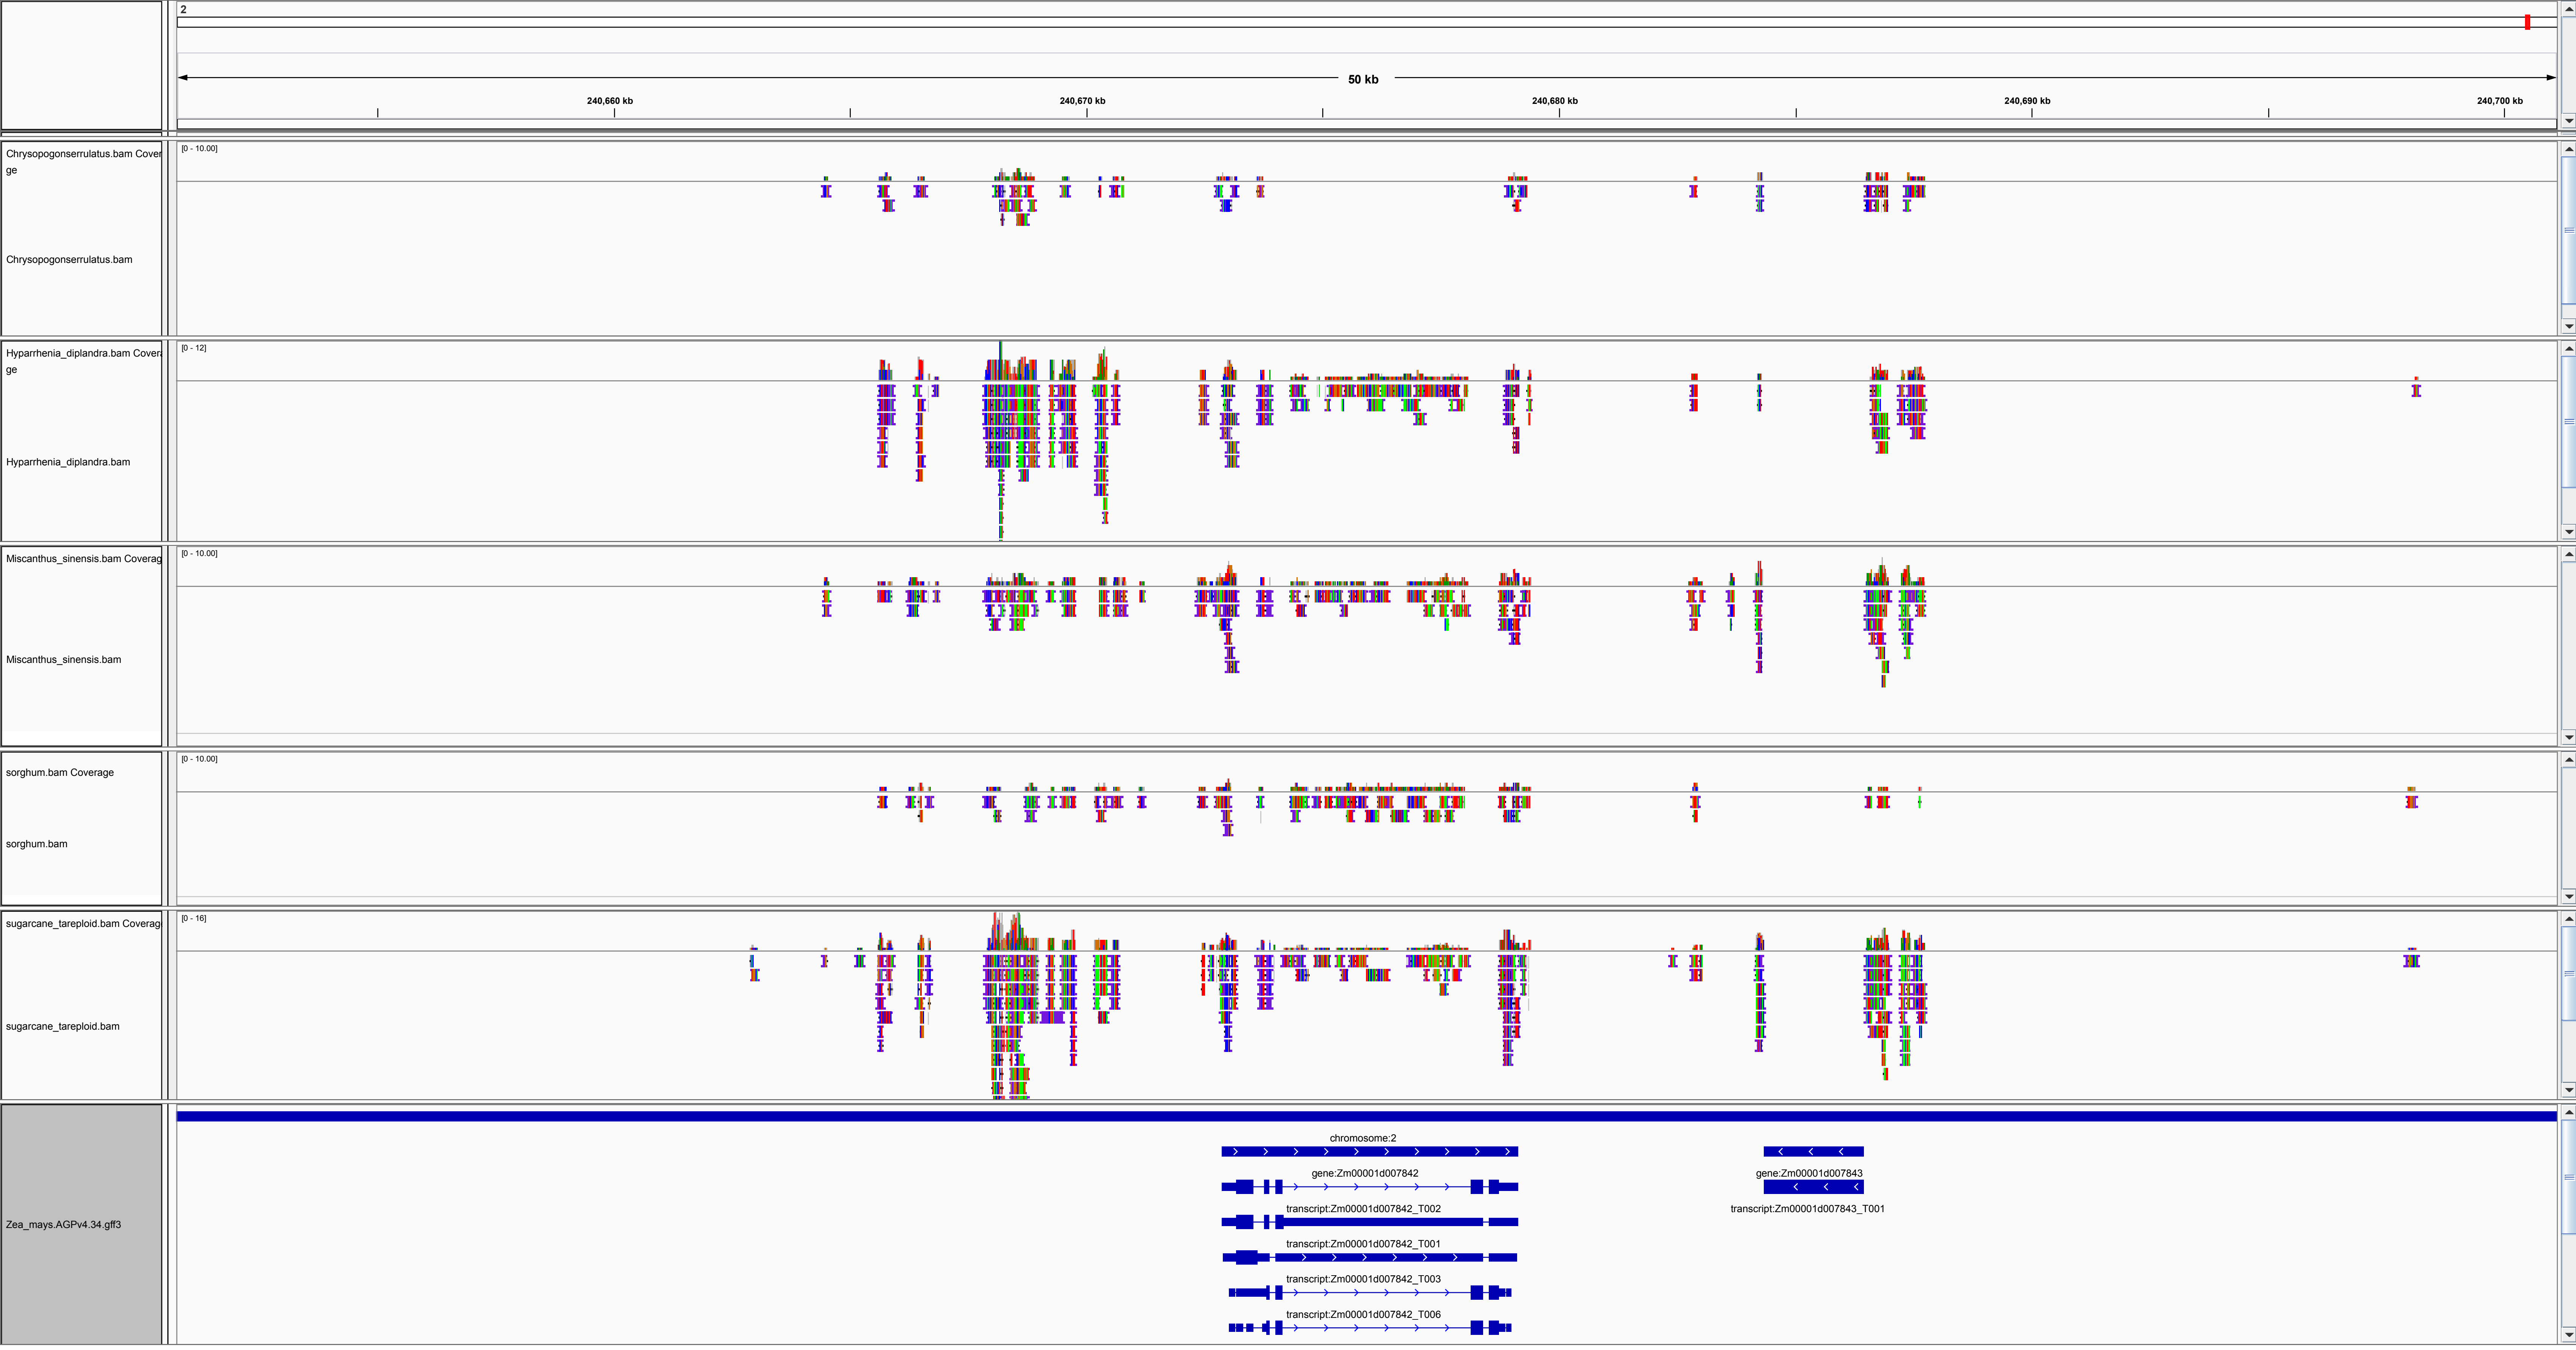

Supplement: Supplemental_Code.tar.gz.zip [file gn1.pdf › dCNS/docs/gn1.pdf]
